# Supplementary material for: FTC-containing molecules: large second-order nonlinear optical performance and excellent thermal stability, and the key development of the “Isolation Chromophore” concept
Source: Royal Society of Chemistry journal article supplement (doi:10.1039/c6tc04282a), 2016-01-01
Supplement: c6tc04282a1.pdf [file c6tc04282a1.pdf]

## Electronic supplementary information (ESI)

# FTC-containing Molecules: Large Second-Order Nonlinear Optical Performance, Excellent Thermal Stability, and the Key Development of the “Isolation Chromophore” Concept

Pengyu Chen,<sup>†</sup> Xiuyang Yin,<sup>†</sup> Yujun Xie,<sup>†</sup> Shufang Li,<sup>‡</sup> Shiyu Luo,<sup>†</sup> Huiyi Zeng,<sup>‡</sup> Guocong Guo,<sup>‡</sup> Qianqian Li,<sup>†</sup> and Zhen Li<sup>\*†</sup>

<sup>†</sup>Department of Chemistry, Wuhan University, Wuhan 430072, China

<sup>‡</sup>Fujian Institute of Research on the Structure of Matter, The Chinese Academy of Sciences, Fuzhou 350002, China

Corresponding author. E-mail: lizhen@whu.edu.cn or lichemlab@163.com (Z. Li).

## Table of Contents

### 1. Additional data and analysis

|                                                                                |      |
|--------------------------------------------------------------------------------|------|
| Chart S1. Some typical molecules we have synthesized in our preview works..... | S-2  |
| Fig. S1 TGA spectra of six compounds.....                                      | S-3  |
| Fig. S2 DSC spectra of five molecules.....                                     | S-3  |
| Fig. S3 FT-IR spectra of five molecules.....                                   | S-4  |
| Fig. S4 UV-vis spectra of M2-M5 .....                                          | S-4  |
| Fig. S5 UV-vis spectrum of films of M1-M5.....                                 | S-5  |
| Fig. S6 NMR spectra of M1-M5.....                                              | S-5  |
| Fig. S7 Mass spectrum of M1-M5 .....                                           | S-9  |
| Table S1 Order parameter of the five films.....                                | S-11 |

### 2. Experimental details

|                                                 |      |
|-------------------------------------------------|------|
| Scheme S1 Synthetic route of FTC-1to FTC-4..... | S-11 |
|-------------------------------------------------|------|

### 3. Reference

## 1. Additional data and analysis

**Chart S1.** Some typical molecules we have synthesized in our preview works.<sup>1-6</sup>

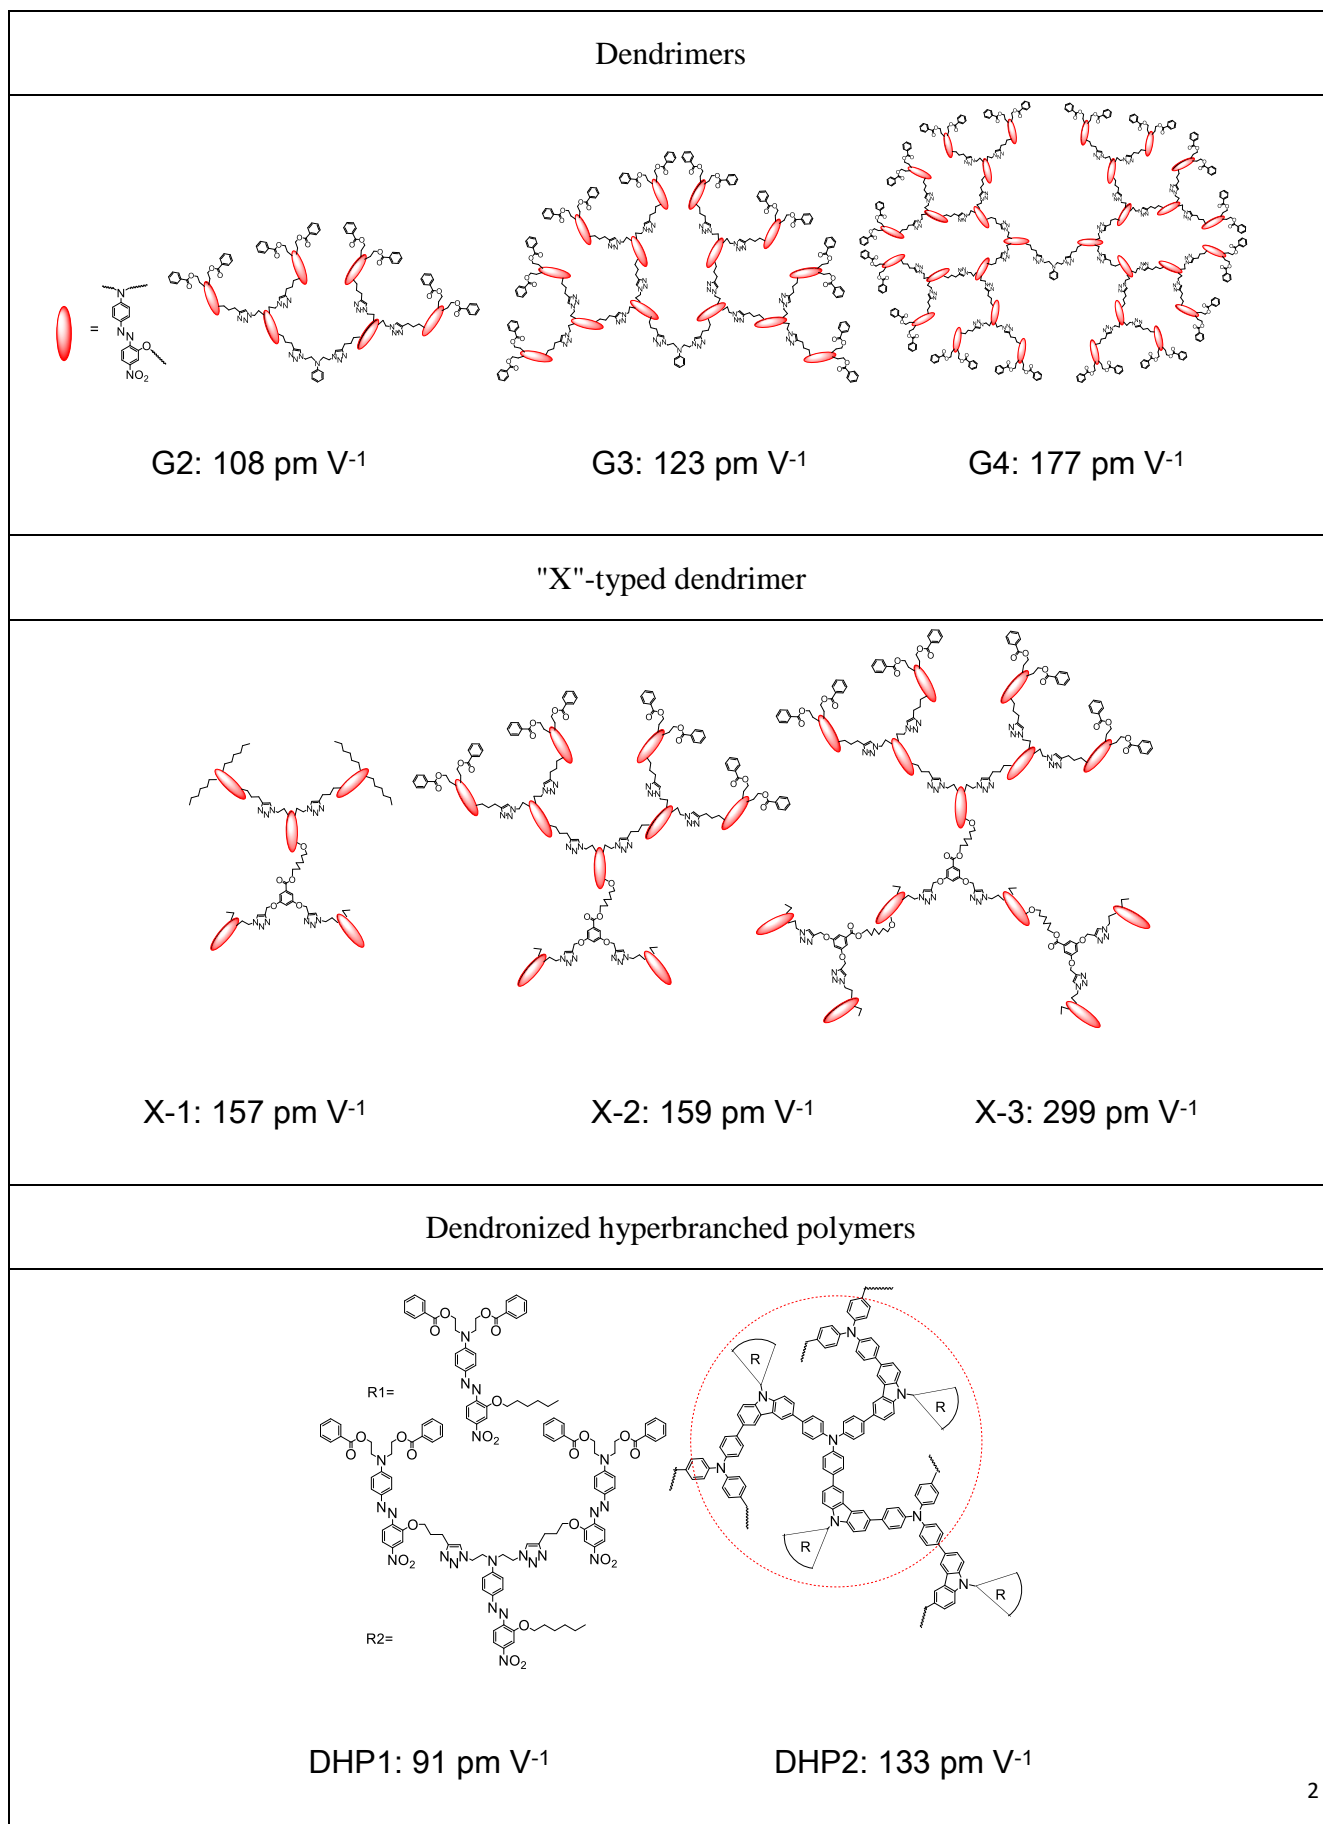

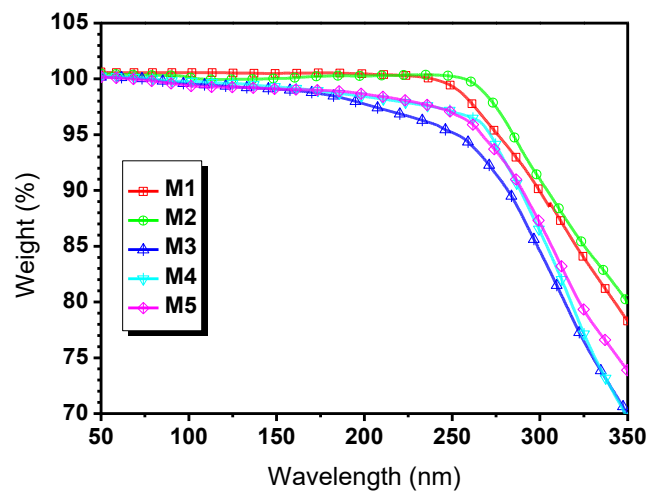

**Fig. S1** TGA spectra of six compounds.

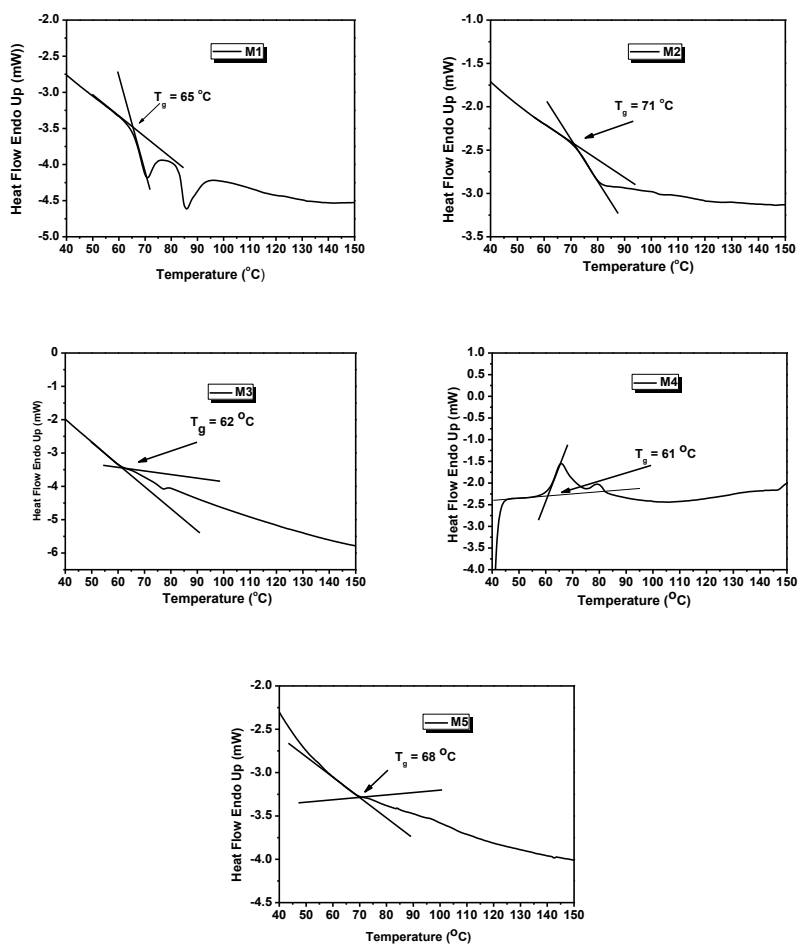

**Fig. S2** DSC curves of five molecules.

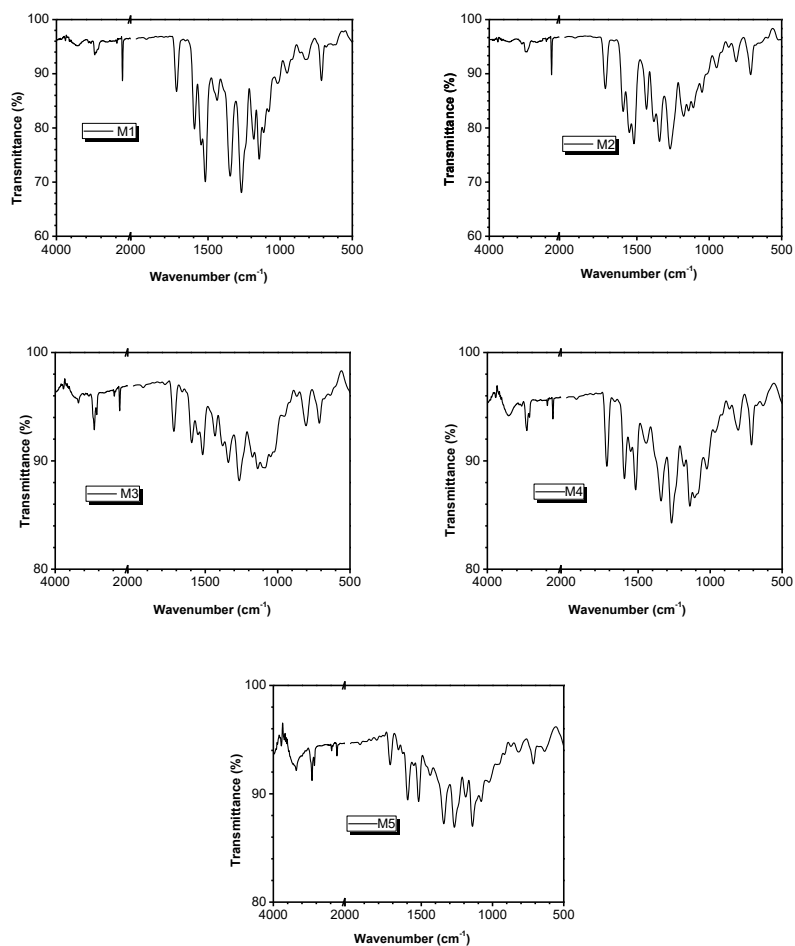

**Fig. S3** FT-IR spectra of five molecules.

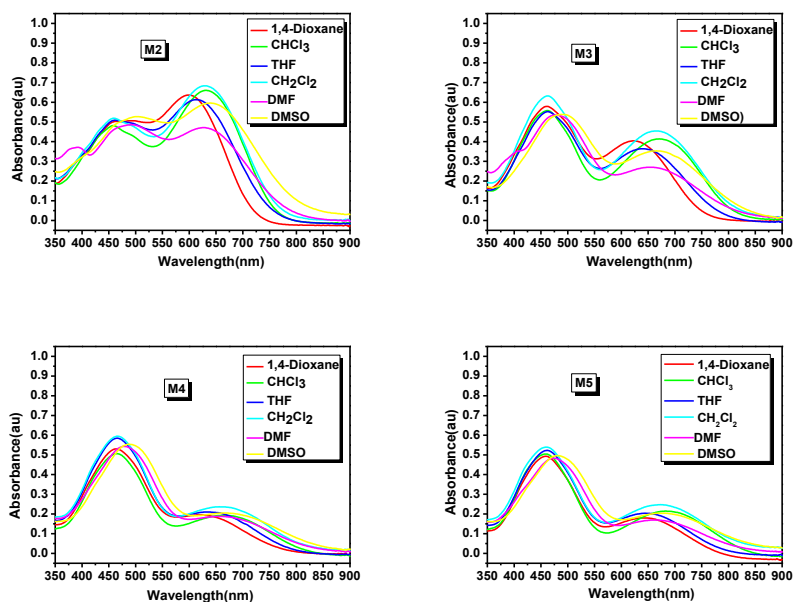

**Fig. S4** UV-Vis spectra of M2-M5.

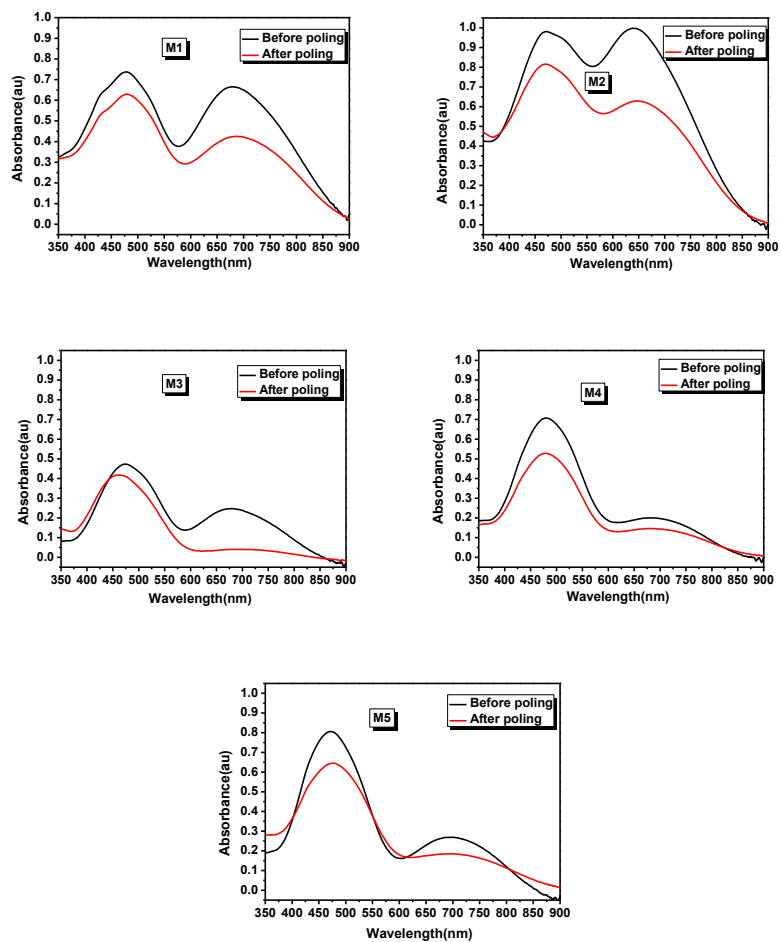

Fig. S5 UV-Vis spectrum of films of M1-M5.

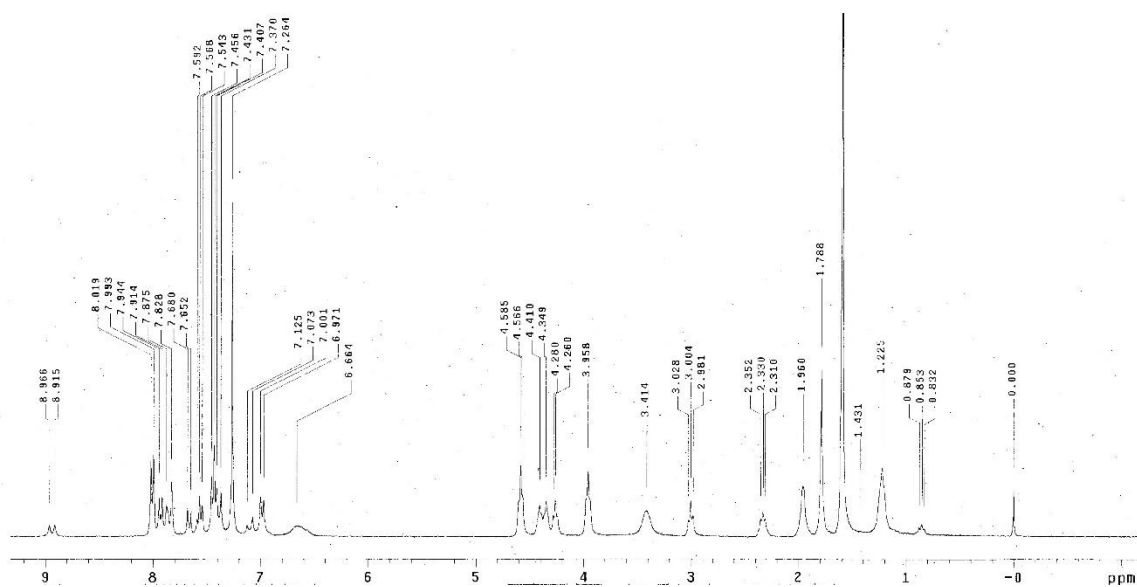

Fig. S6 (A)  $^1\text{H}$  NMR of M1

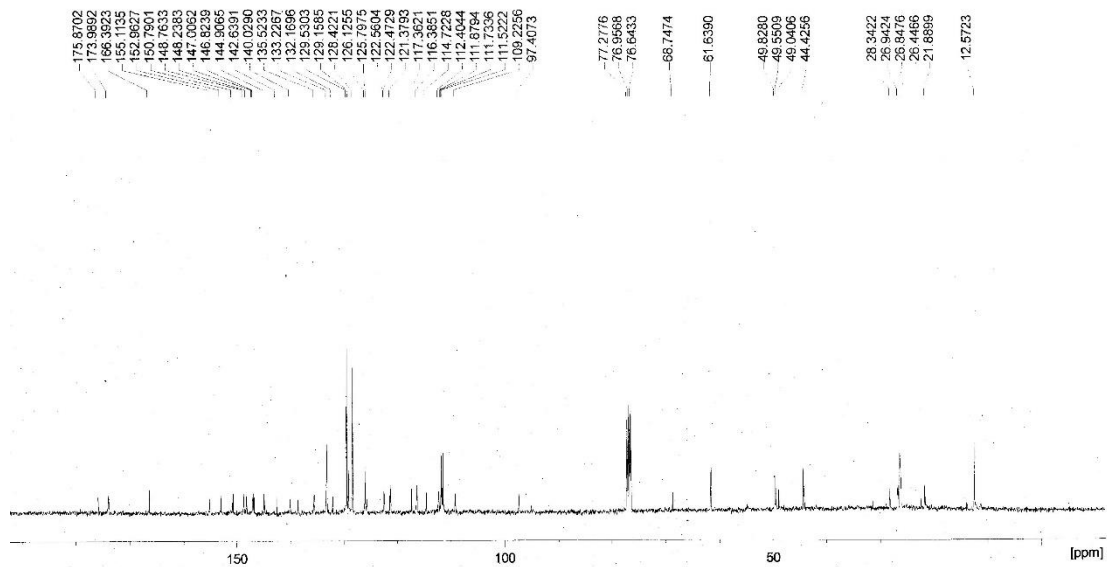

Fig. S6 (B)  $^{13}\text{C}$  NMR of M1

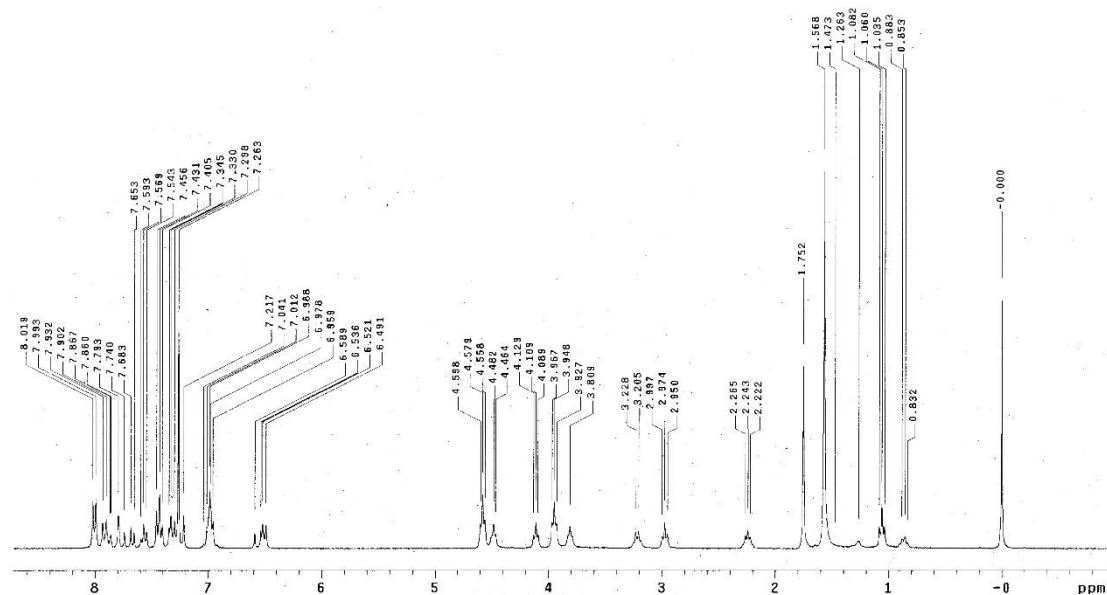

Fig. S6 (C)  $^1\text{H}$  NMR of M2

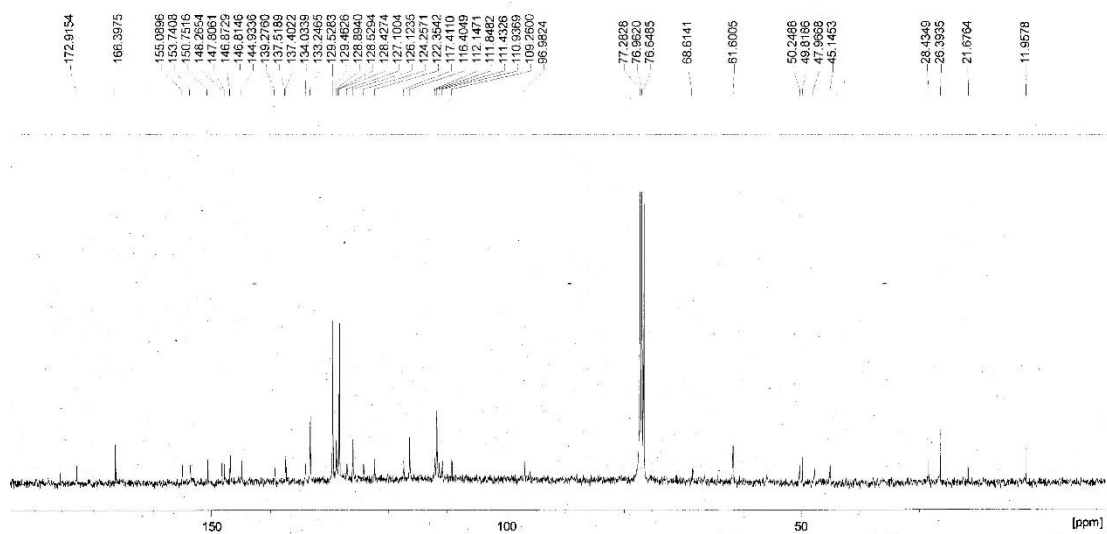

Fig. S6 (D)  $^{13}\text{C}$  NMR of M2

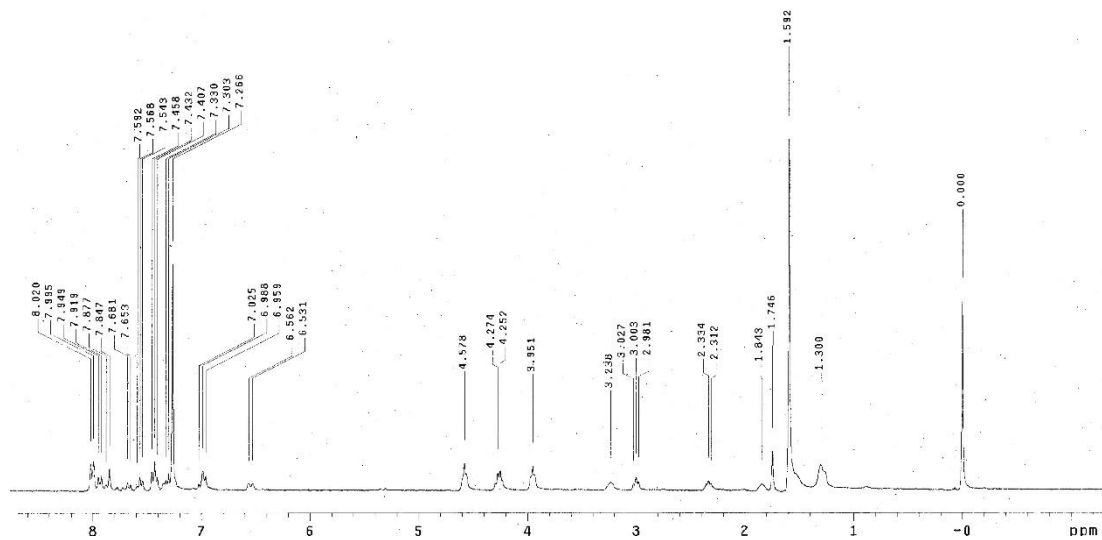

Fig. S6 (E)  $^1\text{H}$  NMR of M3

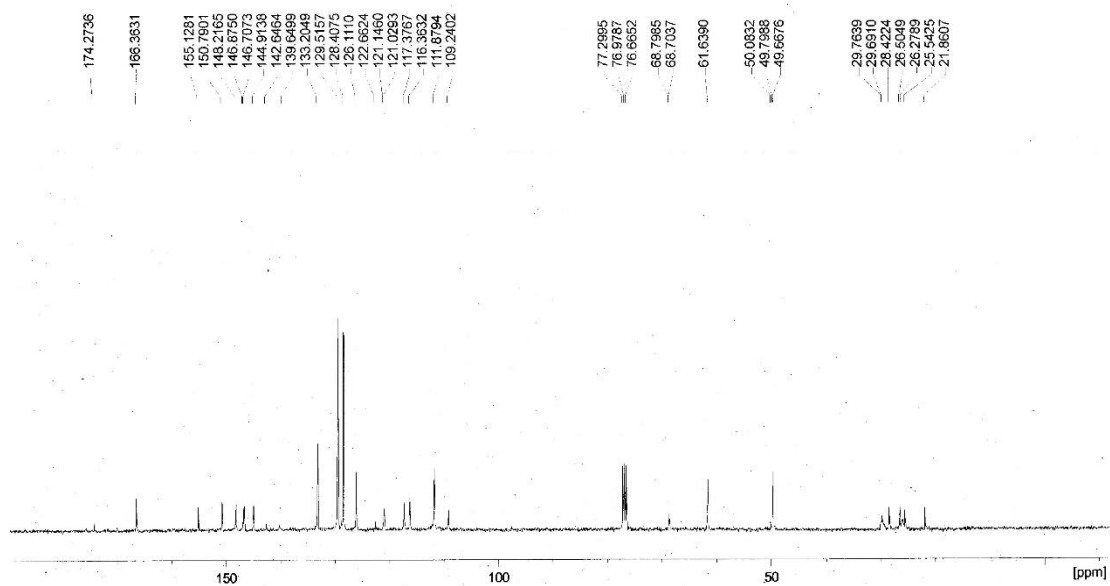

Fig. S6 (F)  $^{13}\text{C}$  NMR of M3

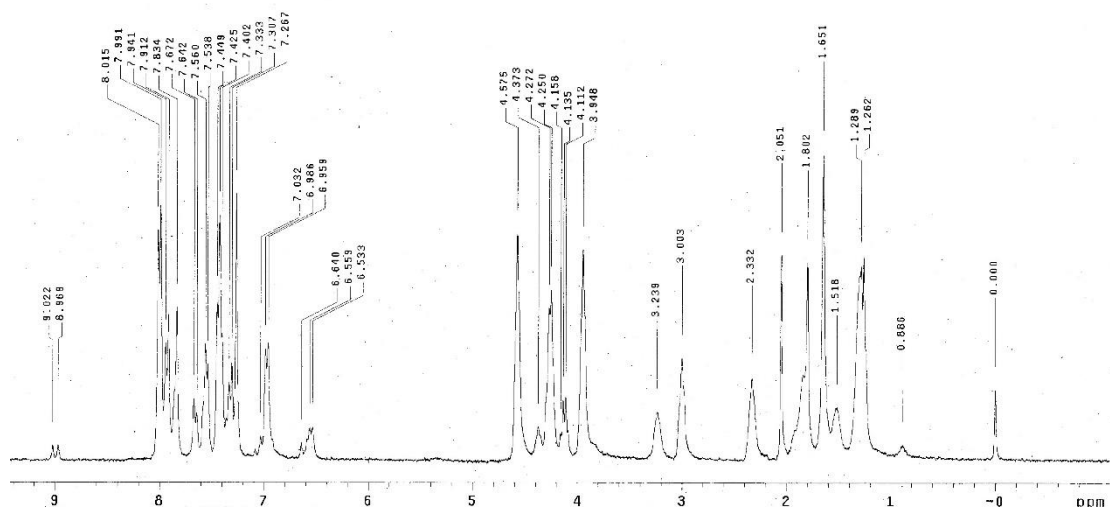

Fig. S6 (H)  $^1\text{H}$  NMR of M4

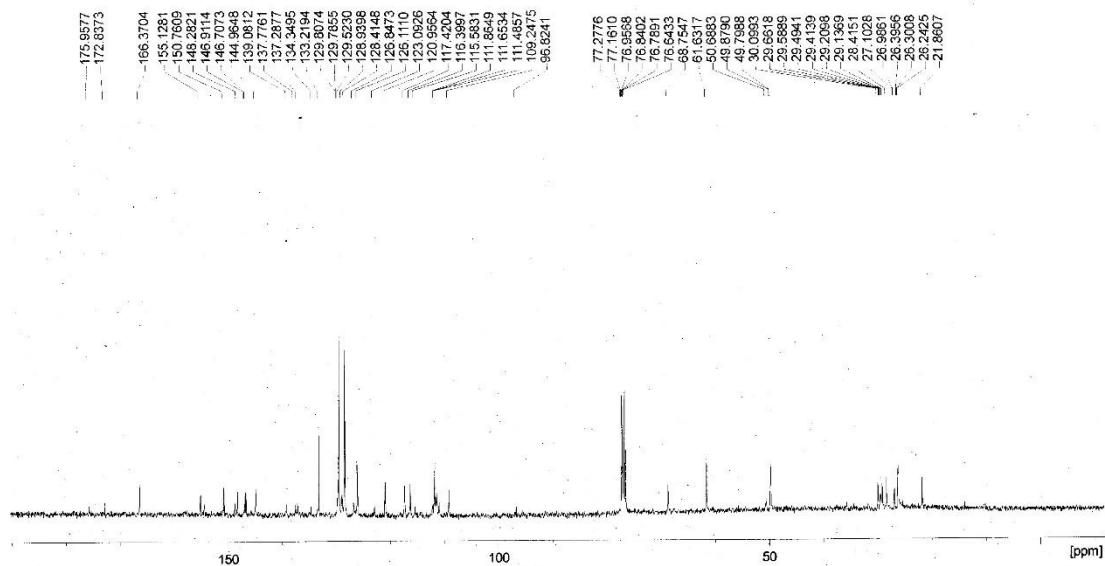

Fig. S6 (I) <sup>13</sup>C NMR of M4

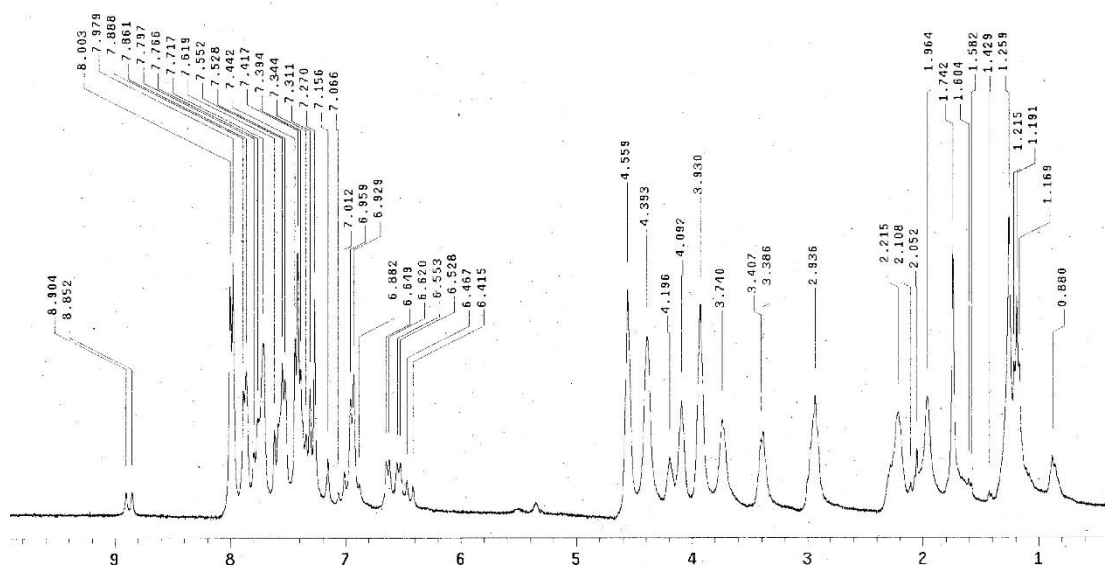

Fig. S6 (J) <sup>1</sup>H NMR of M5



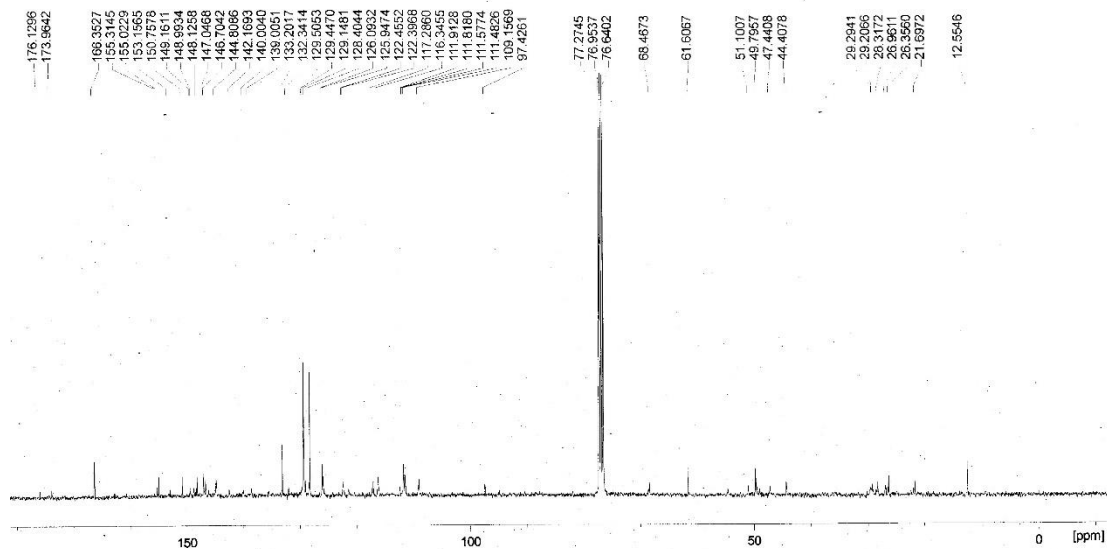

Fig. S6 (K)  $^{13}\text{C}$  NMR of M5

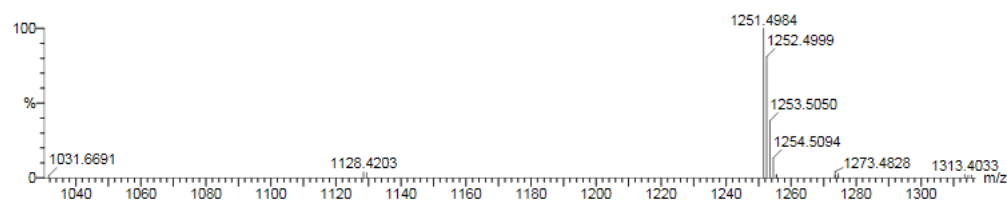

| Mass      | Calc. Mass | mDa  | PPM  | DBE  | i-FIT | i-FIT (Norm) | Formula                                                          |
|-----------|------------|------|------|------|-------|--------------|------------------------------------------------------------------|
| 1251.4984 | 1251.4987  | -0.3 | -0.2 | 43.5 | 12.6  | 0.0          | C <sub>69</sub> H <sub>67</sub> N <sub>14</sub> O <sub>8</sub> S |

Fig. S7 (A) HRMS of M1

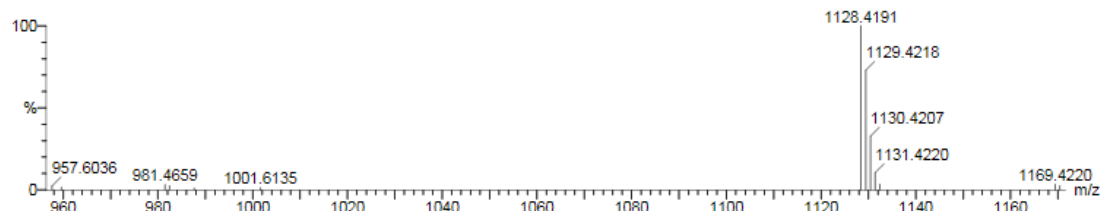

| Mass      | Calc. Mass | mDa | PPM | DBE  | i-FIT | i-FIT (Norm) | Formula                                                          |
|-----------|------------|-----|-----|------|-------|--------------|------------------------------------------------------------------|
| 1128.4191 | 1128.4191  | 0.0 | 0.0 | 40.5 | 13.0  | 0.0          | C <sub>63</sub> H <sub>58</sub> N <sub>11</sub> O <sub>8</sub> S |

Fig. S7 (B) HRMS of M2

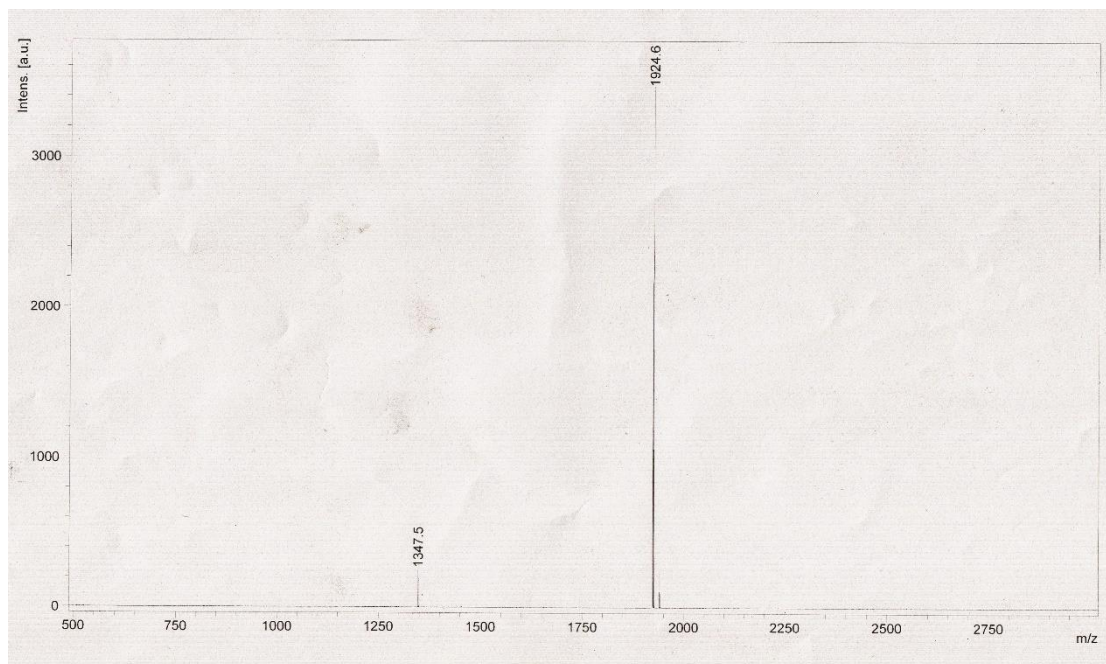

**Fig. S7 (C) TOF of M3**

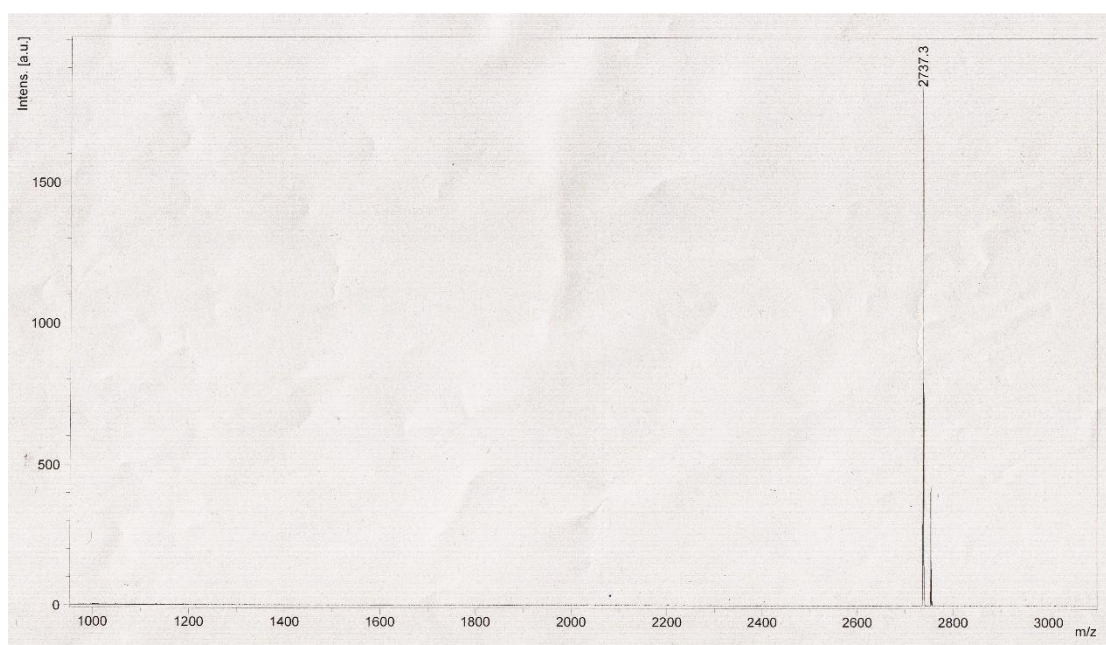

**Fig. S7 (D) TOF of M4**

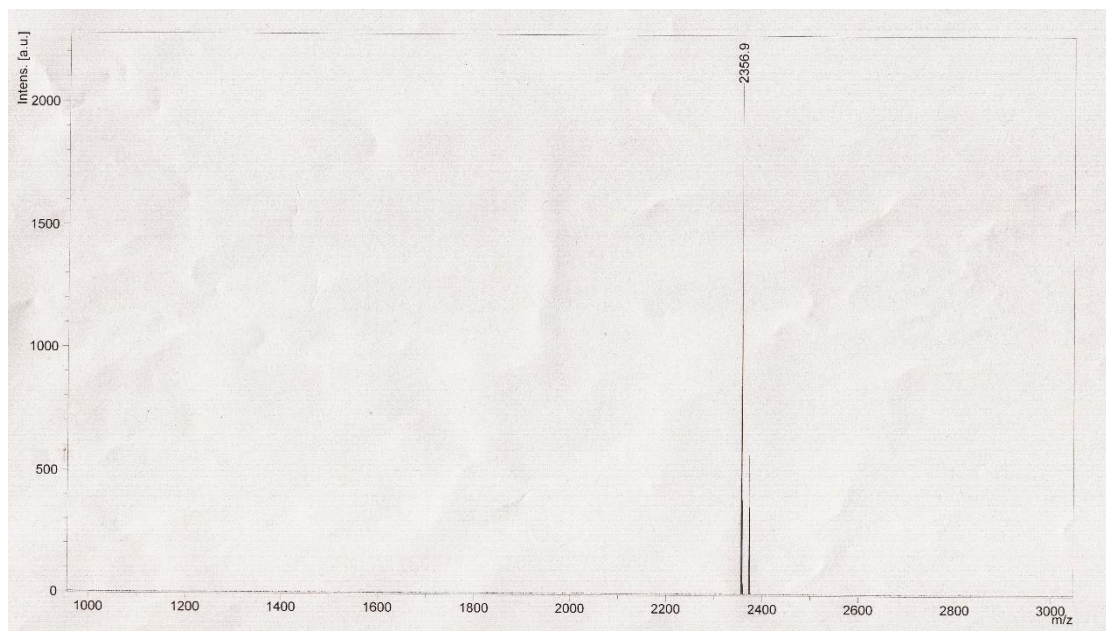

**Fig. S7 (E) TOF of M5**

**Table S1** Order parameter of the five films

| Films     | $\Phi^a$ | $\Phi^b$ |
|-----------|----------|----------|
| <b>M1</b> | 0.14     | 0.36     |
| <b>M2</b> | 0.11     | 0.36     |
| <b>M3</b> | 0.11     | -        |
| <b>M4</b> | 0.25     | 0.27     |
| <b>M5</b> | 0.19     | 0.3      |

$\Phi=1-A1/A0$ , where A1 and A0 are the absorbance of the film after and before corona poling, respectively. <sup>a</sup> The order parameter at the short  $\lambda_{max}$ . <sup>b</sup> The order parameter at the long  $\lambda_{max}$ .

## 2. Experimental details

In this paper, we have synthesized 32 kinds of intermediate products. Compound A, B, E and F were synthesized according to literatures.<sup>7,8</sup> Compound C, D and compound **1-22** were synthesized according to the synthetic routes and procedures presented below.

### A: Synthetic route of FTC-1

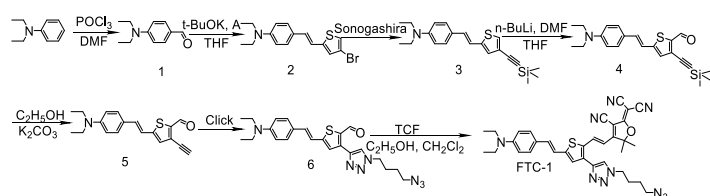

### B: Synthetic route of FTC-2

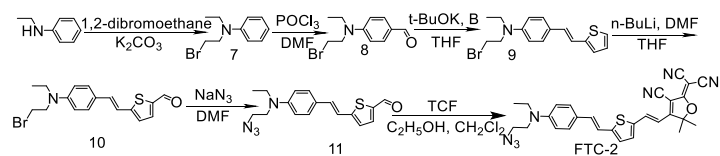

### C: Synthetic route of FTC-3

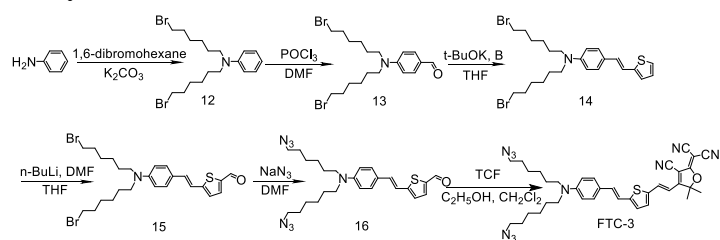

### D: Synthetic route of FTC-4:

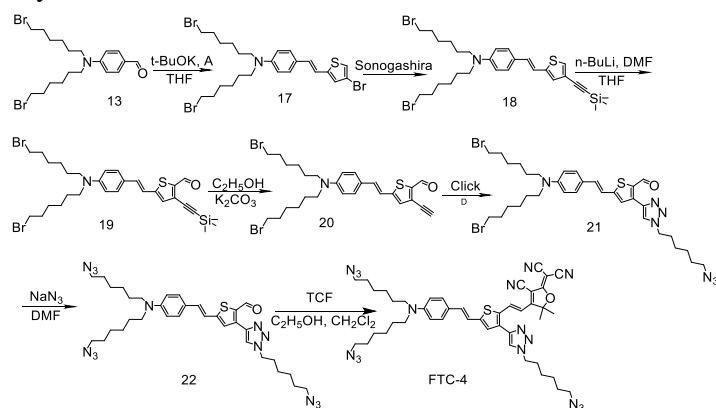

### E: The structure of compound A, B, C, D, E, F, TCF and synthetic routes of compound C and D

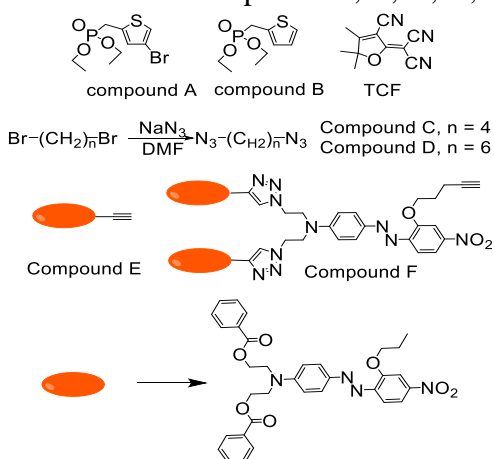

### Scheme S1 Synthetic route of FTC-1to FTC-4

#### 1,4-diazidobutane:

A solution of 1,4-dibromobutane (4.31 g, 20 mol) and sodium azide (3.9 g, 60 mmol) in DMF (20 mL) was stirred at 80 °C for 12 h. Then the reaction mixture was poured into of chloroform (60 mL). The mixture solution was washed with water to remove DMF. The reaction mixture was extracted by dichloromethane (50 mL×3). Then the organic solution was dried over anhydrous sodium sulfate and condensed via rotary evaporation. The residue was purified by column spectroscopy on silica gel using CH<sub>2</sub>Cl<sub>2</sub>/petroleum ether (1:10) as eluent to give a colorless transparent liquid (2.37 g, 84.6%). <sup>1</sup>H NMR (300 MHz, CDCl<sub>3</sub>, 298 K), δ (TMS, ppm): 3.30- 3.25 (m, 4H, -CH<sub>2</sub>-), 1.61-1.57 (m, 4H, -CH<sub>2</sub>-), 1.43-1.41 (m, 4H, -CH<sub>2</sub>-).

### **1,6-diazidohexane:**

**1,6-diazidohexane** was synthesized in a similar manner described above. The product is a colorless transparent liquid (3.2 g, 77.3%). <sup>1</sup>H NMR (300 MHz, CDCl<sub>3</sub>, 298 K), δ (TMS, ppm): 3.33 (m, 4H, -CH<sub>2</sub>-), 1.70-1.67 (m, 4H, -CH<sub>2</sub>-).

### **Compound 1:**

DMF (20 mL) was cooled to 0 °C and maintained at this temperature during the dropwise addition of phosphorus oxychloride (11.5 g, 75 mmol). The solution was kept stirred at 0 °C for 3 h and the temperature was kept constant during the dropwise addition of a solution of *N,N*-diethylaniline (7.46 g, 50 mmol) into DMF (20 mL). The solution was stirred for 2 h and gradually warmed to room temperature and stirred for 12 h at 80 °C before being poured into a 100 mL solution of potassium carbonate (10%) for quenching. The reaction mixture was extracted by dichloromethane (50 mL×3), washed with brine. The organic solution was dried over anhydrous sodium sulfate and condensed via rotary evaporation. The resultant crude product was purified by column chromatography with DCM/PE (1:1) as an eluent to give the product as a yellow oil (5.4 g, 92.1%). <sup>1</sup>H NMR (300 MHz,

CDCl<sub>3</sub>, 298 K),  $\delta$  (TMS, ppm): 9.70 (s, H, -CHO), 7.72-7.69 (d,  $J = 8.4$  Hz, 2H, ArH), 7.69-7.66 (d,  $J = 8.1$  Hz, 2H, ArH), 3.47-3.40 (m, 4H, -CH<sub>2</sub>-), 1.23-1.19 (t,  $J = 6.9$  Hz, 6H, -CH<sub>3</sub>).

#### Compound 2:

Under an atmosphere of nitrogen, a solution of potassium *tert*-butoxide (1.25 g, 11 mmol) in THF (15 mL) was added to a mixture of compound **1** (1.68 g, 9.5 mmol), compound A (2.97 g, 9.5 mmol) in THF (15 mL) over 10 min under magnetic stirring. Stirring was continued for 10 min after the addition, and the reaction mixture was poured into water. After separation of the organic layer, the aqueous phase was extracted with CH<sub>2</sub>Cl<sub>2</sub> (50 mL  $\times$  3). The combined organic solution was dried over anhydrous sodium sulfate and condensed via rotary evaporation. The residue was purified by column spectroscopy on silica gel using CH<sub>2</sub>Cl<sub>2</sub>/petroleum ether (1:10) as eluent to give the product (2.53 g, 79.3%). <sup>1</sup>H NMR (300 MHz, CDCl<sub>3</sub>, 298 K),  $\delta$  (TMS, ppm): 7.33 -7.30 (d,  $J = 8.1$  Hz, 2H, ArH), 6.98-6.90 (m, 4H, -CH=CH-, ArH), 6.65-6.60 (d,  $J = 8.7$  Hz, 2H, ArH), 3.41-3.36 (m, 4H, -CH<sub>2</sub>-), 1.20-1.15 (t,  $J = 6.9$  Hz, 6H, -CH<sub>3</sub>).

#### Compound 3:

Under an atmosphere of nitrogen, a solution of compound **2** (0.80 g, 2.45 mmol), CuI (11.2 mg, 0.059 mmol), Pd(PPh<sub>3</sub>)<sub>2</sub>Cl<sub>2</sub> (6.9 mg, 0.0098 mmol), PPh<sub>3</sub> (10.3 mg, 0.039 mmol) in Et<sub>3</sub>N (10 mL) was cooled to 0 °C and maintained at this temperature during the dropwise addition of ethynyltrimethylsilane (0.36 g, 3.7 mmol). The solution was stirred for 2 h and gradually warmed to room temperature and stirred for 12 h at 80 °C. Then the solution was condensed via rotary evaporation. The resultant crude product was purified by column chromatography with DCM/PE (1:3) as an eluent to give a yellow powder (0.81 g, 100%). <sup>1</sup>H NMR (300 MHz, CDCl<sub>3</sub>, 298 K),  $\delta$  (TMS, ppm): 7.33-7.30 (d,  $J = 8.1$  Hz, 2H, ArH), 6.96-6.79 (m, 4H, -CH=CH-, ArH), 6.65-6.62 (d,

$J = 8.1$  Hz, 2H, ArH), 3.38-3.36 (m, 4H,  $-\text{CH}_2-$ ), 1.19-1.15 (t,  $J = 6.6$  Hz, 6H,  $-\text{CH}_3$ ), 0.23 (s, 9H,  $-\text{CH}_3$ ).

#### Compound 4:

Under an atmosphere of nitrogen, a solution of compound **3** (447 mg, 1.33 mmol) in THF (15 mL) was cooled to  $-78$  °C and maintained at this temperature during the dropwise addition of *N*-butyllithium (1.74 mmol, 1.05 mL, 1.65 M in hexane). Stirring was continued for another 1 h, then anhydrous DMF (0.13 mL) was added through syringe over 5 min. The mixture was heated to room temperature and stirred for 30 min. Then the reaction mixture was poured into water. After separation of the organic layer, the aqueous phase was extracted with  $\text{CH}_2\text{Cl}_2$  (50 mL  $\times$  2). The combined organic solution was dried over anhydrous sodium sulfate and condensed via rotary evaporation. The residue was purified by column spectroscopy on silica gel using  $\text{CH}_2\text{Cl}_2$ /petroleum ether (1:3) as eluent to give a red solid (306 mg, 40.4%).  $^1\text{H}$  NMR (300 MHz,  $\text{CDCl}_3$ , 298 K),  $\delta$  (TMS, ppm): 10.01 (s, H,  $-\text{CHO}$ ), 7.37-7.34 (d,  $J = 8.7$  Hz, 2H, ArH), 7.08-6.84 (m, 3H,  $-\text{CH}=\text{CH}-$ , ArH), 6.65-6.63 (d,  $J = 8.7$  Hz, 2H, ArH), 3.43-3.36 (m, 4H,  $-\text{CH}_2-$ ), 1.21-1.16 (t,  $J = 6.6$  Hz, 6H,  $-\text{CH}_3$ ), 0.27 (s, 9H,  $-\text{CH}_3$ ).

#### Compound 5;

Under an atmosphere of nitrogen, a solution of compound **4** (300 mg, 0.786 mmol) and potassium carbonate (158 mg, 0.865 mmol) in  $\text{C}_2\text{H}_5\text{OH}$  (20 mL) was stirred at room temperature for 1 h. Then the solution was condensed via rotary evaporation. The resultant crude product was purified by column chromatography with DCM/PE (1:3) as an eluent to give a red solid (260 mg, 100%).  $^1\text{H}$  NMR (300 MHz,  $\text{CDCl}_3$ , 298 K),  $\delta$  (TMS, ppm): 10.02 (s, H,  $-\text{CHO}$ ), 7.37-7.35 (d,  $J = 8.4$  Hz, 2H, ArH), 7.09-6.86 (m, 3H,  $-\text{CH}=\text{CH}-$ , ArH), 6.66-6.63 (d,  $J = 8.4$  Hz, 2H, ArH), 3.43-3.36 (m, 4H,

-CH<sub>2</sub>-, -C≡CH), 1.21-1.16 (t, *J* = 6.9 Hz, 6H, -CH<sub>3</sub>).

#### Compound 6:

Under an atmosphere of nitrogen, a solution of compound **5** (86 mg, 0.28 mmol), 1,4-diazidobutane (47 mg, 0.33 mmol), copper sulfate pentahydrate (7 mg, 0.028 mmol), sodium bicarbonate (5 mg, 0.056 mmol), Sodium L-ascorbate (10 mg, 0.056 mmol) in THF/H<sub>2</sub>O (1/0.2 mL) was stirred at 28-30 °C for 3 h. Then the reaction mixture was poured into water. After separation of the organic layer, the aqueous phase was extracted with CH<sub>2</sub>Cl<sub>2</sub> (50 mL × 2). The combined organic solution was dried over anhydrous sodium sulfate and condensed via rotary evaporation. The resultant crude product was purified by column spectroscopy on silica gel using CH<sub>2</sub>Cl<sub>2</sub>/PE (1:3) as eluent to give a red solid (69 mg, 55.2%). <sup>1</sup>H NMR (300 MHz, CDCl<sub>3</sub>, 298 K), δ (TMS, ppm): 10.29 (s, H, -CHO), 8.08 (s, H, -CH=), 7.43 (s, H, ArH), 7.39-7.36 (d, *J* = 8.4 Hz, 2H, ArH), 7.14-6.93 (m, 2H, -CH=CH-), 6.73-6.64 (d, *J* = 8.7 Hz, 2H, ArH), 4.51-4.46 (m, 4H, -CH<sub>2</sub>-), 3.43-3.36 (m, 4H, -CH<sub>2</sub>-), 2.11 -2.06 (m, 2H, -CH<sub>2</sub>-), 1.69-1.61 (m, 2H, -CH<sub>2</sub>-), 1.21-1.17 (t, *J* = 7.5 Hz, 6H, -CH<sub>3</sub>).

#### FTC-1:

Under an atmosphere of nitrogen, a solution of compound **5** (67 mg, 0.15 mmol), TCF (39 mg, 0.195 mmol) and ammonium acetate in C<sub>2</sub>H<sub>5</sub>OH/DCM (3/0.6 mL) was stirred at room temperature for 12 h. Then the solution was condensed via rotary evaporation. The resultant crude product was purified by column chromatography with DCM/EA (10:1) as an eluent to give a blue powder (54 mg, 55.6%). <sup>1</sup>H NMR (300 MHz, CDCl<sub>3</sub>, 298 K), δ (TMS, ppm): 9.03-8.98 (d, *J* = 15.3 Hz, H, -CH=), 7.92 (s, H, -CH=), 7.41-7.38 (d, *J* = 8.4 Hz, 2H, ArH), 7.13-6.94 (m, 2H, -CH=CH), 6.68-6.63 (m, 3H, ArH), 4.51-4.46 (m, 2H, -CH<sub>2</sub>-), 3.43-3.36 (m, 4H, -CH<sub>2</sub>-), 2.12-2.07 (m, 2H, -CH<sub>2</sub>-), 1.82 (s, 6H, -CH<sub>3</sub>), 1.68-1.63 (m, 4H, -CH<sub>2</sub>-), 1.23-1.19 (t, *J* = 6.3 Hz, 6H, -CH<sub>3</sub>).



#### Compound 7:

A solution of N-ethylaniline (4.4 g, 36.3 mmol), 1,2-dibromoethane (13.6 g, 72.6 mmol) and potassium carbonate (2.5 g, 18.1 mmol) was stirred at 80 °C for 12 h. Then the reaction mixture was poured into water. After separation of the organic layer, the aqueous phase was extracted with CH<sub>2</sub>Cl<sub>2</sub> (50 mL × 2). The combined organic solution was dried over anhydrous sodium sulfate and condensed via rotary evaporation and reduced pressure distillation. The resultant crude product was purified by column spectroscopy on silica gel using CH<sub>2</sub>Cl<sub>2</sub>/PE (1:5) as eluent to give a yellow oil (6.03 g, 72.8%). <sup>1</sup>H NMR (300 MHz, CDCl<sub>3</sub>, 298 K), δ (TMS, ppm): 7.23-7.21 (m, 2H, ArH), 6.73-6.67 (m, 3H, ArH), 3.70-3.65 (m, 2H, -CH<sub>2</sub>-), 3.45-3.38 (m, 4H, -CH<sub>2</sub>-), 1.20-1.56 (t, *J* = 6.9 Hz, 3H, -CH<sub>3</sub>).

#### Compound 8:

Compound 8 was synthesized in a similar manner as compound 1, the product is a yellow oil (4.2 g, 62.4%). <sup>1</sup>H NMR (300 MHz, CDCl<sub>3</sub>, 298 K), δ (TMS, ppm): 9.75 (s, H, -CHO), 7.76-7.73 (d, *J* = 7.8 Hz, 2H, ArH), 6.73-6.70 (d, *J* = 7.8 Hz, 2H, ArH), 3.72-3.70 (m, 2H, -CH<sub>2</sub>-), 3.66-3.64 (m, 2H, -CH<sub>2</sub>-), 3.53-3.51 (m, 2H, -CH<sub>2</sub>-), 1.20-1.16 (t, *J* = 5.4 Hz, 3H, -CH<sub>3</sub>).

#### Compound 9:

A solution of potassium *tert*-butoxide (1.33 g, 11.8 mmol) in THF (20 mL) was added to a mixture of compound 8 (2.63 g, 10.3 mmol), compound B (2.53 g, 10.8 mmol) in THF (20 mL) over 10 min under magnetic stirring. Stirring was continued for 10 min after the addition, and the reaction mixture was poured into water and extracted with CH<sub>2</sub>Cl<sub>2</sub> (50 mL × 3). The combined organic solution was dried over anhydrous sodium sulfate and condensed via rotary evaporation. The resultant crude product was purified by column spectroscopy on silica gel using CH<sub>2</sub>Cl<sub>2</sub>/PE (1:10) as

eluent to give a yellow solid (1.85 g, 53.6%). <sup>1</sup>H NMR (300 MHz, CDCl<sub>3</sub>, 298 K), δ (TMS, ppm): 7.37-7.34 (d, *J* = 8.4 Hz, 2H, ArH), 7.12-6.82 (m, 4H, ArH), 6.68-6.65 (d, *J* = 8.1 Hz, 2H, ArH), 3.63 (m, 4H, -CH<sub>2</sub>-), 3.48-3.41 (m, 2H, -CH<sub>2</sub>-), 1.22-1.17 (t, *J* = 6.9 Hz, 3H, -CH<sub>3</sub>).

#### Compound **10**:

Compound **10** was synthesized in a similar manner described as compound **4**, the product was a red solid (1.5g, 81%). <sup>1</sup>H NMR (300 MHz, CDCl<sub>3</sub>, 298 K), δ (TMS, ppm): 9.82 (s, H, -CHO), 7.64-7.63 (m, H, ArH), 7.41-7.38 (d, *J* = 8.7 Hz, 2H, ArH), 7.11-6.97 (m, 3H, ArH), 6.68-6.65 (d, *J* = 9.0 Hz, 2H, ArH), 3.67-3.60 (m, 4H, -CH<sub>2</sub>-), 3.50-3.43 (m, 2H, -CH<sub>2</sub>-), 1.23-1.18 (t, *J* = 7.2 Hz, 3H, -CH<sub>3</sub>).

#### Compound **11**:

Under an atmosphere of nitrogen, a solution of compound **10** (1.4 g, 3.8 mmol) and sodium azide (0.38 g, 5.7 mmol) in DMF (20 mL) was stirred at 80 °C for 6 h. Then the reaction mixture was poured into water. CHCl<sub>3</sub> (60 mL) was added. The DMF was removed by washing with water. After separation of the organic layer, the aqueous phase was extracted with CH<sub>2</sub>Cl<sub>2</sub> (50 mL × 2). The combined organic solution was dried over anhydrous sodium sulfate and condensed via rotary evaporation. The residue was purified by column spectroscopy on silica gel using CH<sub>2</sub>Cl<sub>2</sub>/PE (1:1) as eluent to give a red solid (1.16 g, 92.8%). <sup>1</sup>H NMR (300 MHz, CDCl<sub>3</sub>, 298 K), δ (TMS, ppm): 9.81 (s, H, -CHO), 7.63-7.62 (m, H, ArH), 7.40-7.37 (d, *J* = 8.4 Hz, 2H, ArH), 7.11-6.96 (m, 3H, ArH), 6.70-6.67 (d, *J* = 8.4 Hz, 2H, ArH), 3.53-3.43 (m, 6H, -CH<sub>2</sub>-), 1.22-1.17 (t, *J* = 7.5 Hz, 3H, -CH<sub>3</sub>).

#### FTC-2:

FTC-2 was synthesized in a similar manner described as FTC-1, the product was a blue powder

(300 mg, 41%).  $^1\text{H}$  NMR (300 MHz,  $\text{CDCl}_3$ , 298 K),  $\delta$  (TMS, ppm): 7.79-7.74 (d,  $J = 15.3$  Hz, H, -CH=), 7.42-7.39 (d,  $J = 9.0$  Hz, 2H, ArH), 7.37-7.36 (m, H, ArH), 7.11-6.98 (m, 3H, -CH=CH-, ArH), 6.71-6.68 (d,  $J = 9.0$  Hz, 2H, ArH), 6.60-6.54 (d,  $J = 15.6$  Hz, H, -CH=), 3.55-3.45 (m, 6H, -CH<sub>2</sub>-), 1.74 (s, 6H, -CH<sub>3</sub>), 1.23-1.19 (t,  $J = 10.2$  Hz, 3H, -CH<sub>3</sub>).

#### Compound **12**:

A solution of aniline (4.66 g, 50 mmol), 1,6-dibromohexane (73.2 g, 300 mmol) and potassium carbonate (13.8 g, 100 mmol) was stirred at 80 °C for 12 h. Then the reaction mixture was poured into water. After separation of the organic layer, the aqueous phase was extracted with  $\text{CH}_2\text{Cl}_2$  (50 mL  $\times$  2). The combined organic solution was dried over anhydrous sodium sulfate and condensed via rotary evaporation and reduced pressure distillation. The residue was purified by column spectroscopy on silica gel using  $\text{CH}_2\text{Cl}_2/\text{PE}$  (1:5) as eluent to give a yellow oil (10.0 g, 47.8%).  $^1\text{H}$  NMR (300 MHz,  $\text{CDCl}_3$ , 298 K),  $\delta$  (TMS, ppm): 7.23-7.18 (m, 2H, ArH), 6.64-6.61 (m, 3H, ArH), 3.44-3.39 (m, 4H, -CH<sub>2</sub>-), 3.28-3.23 (m, 4H, -CH<sub>2</sub>-), 1.92-1.82 (m, 4H, -CH<sub>2</sub>-), 1.64-1.54 (m, 4H, -CH<sub>2</sub>-), 1.50-1.43 (m, 4H, -CH<sub>2</sub>-), 1.39-1.34 (m, 4H, -CH<sub>2</sub>-)

#### Compound **13**:

Compound **13** was synthesized in a similar manner described as compound **1**, the product was a yellow oil (5.0g, 68.7%).  $^1\text{H}$  NMR (300 MHz,  $\text{CDCl}_3$ , 298 K),  $\delta$  (TMS, ppm): 9.70 (s, H, -CHO), 7.72-7.69 (d,  $J = 9.0$  Hz, 2H, ArH), 6.65-6.62 (d,  $J = 8.7$  Hz, 2H, ArH), 3.57-3.53 (m, 4H, -CH<sub>2</sub>-), 3.38-3.33 (m, 4H, -CH<sub>2</sub>-), 1.82-1.75 (m, 4H, -CH<sub>2</sub>-), 1.66-1.56 (m, 4H, -CH<sub>2</sub>-), 1.53-1.46 (m, 4H, -CH<sub>2</sub>-), 1.42-1.37 (m, 4H, -CH<sub>2</sub>-).

#### Compound **14**:

A solution of potassium *tert*-butoxide (0.15 mg, 1.31 mmol) in THF (10 mL) was added to a mixture of compound **B** (0.30 g, 1.25 mmol) and compound **13** (510 mg, 1.14 mmol), in THF (10 mL) over 10 min under magnetic stirring. Stirring was continued for 10 min after the addition, and the reaction mixture was poured into water. After separation of the organic layer the aqueous phase was extracted with CH<sub>2</sub>Cl<sub>2</sub> (50 mL × 2). The combined organic solution was dried over anhydrous sodium sulfate and condensed via rotary evaporation. The residue was purified by column spectroscopy on silica gel using CH<sub>2</sub>Cl<sub>2</sub>/PE (1:1) as eluent to give a yellow solid (510 mg, 84.8%). <sup>1</sup>H NMR (300 MHz, CDCl<sub>3</sub>, 298 K), δ (TMS, ppm): 7.33-7.31 (d, *J* = 8.4 Hz, 2H, ArH), 7.11-7.09 (m, 1H, ArH), 7.03-6.81 (m, 3H, -CH=CH-, ArH), 6.60-6.58 (d, *J* = 8.7 Hz, 2H, ArH), 3.56-3.52 (m, 4H, -CH<sub>2</sub>-), 3.30-3.25 (m, 4H, -CH<sub>2</sub>-), 1.81-1.74 (m, 4H, -CH<sub>2</sub>-), 1.60-1.54 (m, 4H, -CH<sub>2</sub>-), 1.51-1.44 (m, 4H, -CH<sub>2</sub>-), 1.37-1.35 (m, 4H, -CH<sub>2</sub>-).

#### Compound **15**:

Compound **15** was synthesized in a similar manner described as compound **4**, the product was a red solid (400 mg, 41%). <sup>1</sup>H NMR (300 MHz, CDCl<sub>3</sub>, 298 K), δ (TMS, ppm): 9.81 (s, H, ArH), 7.64-7.62 (m, 1H, ArH), 7.38-7.35 (d, *J* = 8.7 Hz, 2H, ArH), 7.11-6.94 (m, 3H, -CH=CH-, ArH), 6.62-6.59 (d, *J* = 9.0 Hz, 2H, ArH), 3.57-3.53 (m, 4H, -CH<sub>2</sub>-), 3.33-3.28 (m, 4H, -CH<sub>2</sub>-), 1.84-1.75 (m, 4H, -CH<sub>2</sub>-), 1.61-1.55 (m, 4H, -CH<sub>2</sub>-), 1.52-1.45 (m, 4H, -CH<sub>2</sub>-), 1.38-1.36 (m, 4H, -CH<sub>2</sub>-).

#### Compound **16**:

Compound **16** was synthesized in a similar manner described as compound **11**, the product was a red solid (350 mg, 99%). <sup>1</sup>H NMR (300 MHz, CDCl<sub>3</sub>, 298 K), δ (TMS, ppm): 9.81 (s, H, ArH), 7.64-7.62 (m, 1H, ArH), 7.38-7.35 (d, *J* = 8.7 Hz, 2H, ArH), 7.11-6.94 (m, 3H, -CH=CH-, ArH), 6.61-6.58 (d, *J* = 8.4 Hz, 2H, ArH), 3.33-3.26 (m, 8H, -CH<sub>2</sub>-), 1.62 (m, 8H, -CH<sub>2</sub>-), 1.40 (m, 8H,

-CH<sub>2</sub>-).

### **FTC-3:**

**FTC-3** was synthesized in a similar manner described as **FTC-1**, the product was a blue powder (200 mg, 81%). <sup>1</sup>H NMR (300 MHz, CDCl<sub>3</sub>, 298 K), δ (TMS, ppm): 7.79-7.73 (d, *J* = 15.6 Hz, H, -CH=), 7.40-7.37 (m, 3H, ArH), 7.11-6.96 (m, 3H, -CH=CH-, ArH), 6.63-6.60 (d, *J* = 8.4 Hz, 2H, ArH), 6.58-6.53 (d, *J* = 15.9 Hz, H, -CH=), 3.35-3.26 (m, 8H, -CH<sub>2</sub>-), 1.75 (s, 6H, -CH<sub>3</sub>), 1.64-1.58 (m, 8H, -CH<sub>2</sub>-), 1.40 (m, 8H, -CH<sub>2</sub>-).

### **Compound 17:**

Compound **17** was synthesized in a similar manner described as compound **2**, the product was a yellow solid (4.0g, 65.2%). <sup>1</sup>H NMR (300 MHz, CDCl<sub>3</sub>, 298 K), δ (TMS, ppm): 7.32-7.29 (d, *J* = 8.1 Hz, 2H, ArH), 6.98 (s, 1H, ArH), 6.92-6.79 (m, 3H, -CH=CH-, ArH), 6.60-6.57 (d, *J* = 8.4 Hz, 2H, ArH), 3.57-3.52 (m, 4H, -CH<sub>2</sub>-), 3.31-3.26 (m, 4H, -CH<sub>2</sub>-), 1.83-1.74 (m, 4H, -CH<sub>2</sub>-), 1.63-1.58 (m, 4H, -CH<sub>2</sub>-), 1.51-1.44 (m, 4H, -CH<sub>2</sub>-), 1.37-1.35 (m, 4H, -CH<sub>2</sub>-).

### **Compound 18:**

Compound **18** was synthesized in a similar manner described as compound **3**, the product was a yellow solid (3.1 g, 63.3%). <sup>1</sup>H NMR (300 MHz, CDCl<sub>3</sub>, 298 K), δ (TMS, ppm): 7.32-7.29 (d, *J* = 8.4 Hz, 2H, ArH), 7.26 (s, H, ArH), 6.96 (s, H, ArH), 6.92-6.78 (m, 2H, -CH=CH-), 6.61-6.58 (d, *J* = 8.7 Hz, 2H, ArH), 3.56-3.52 (m, 4H, -CH<sub>2</sub>-), 3.30-3.26 (m, 4H, -CH<sub>2</sub>-), 1.81-1.76 (m, 4H, -CH<sub>2</sub>-), 1.60-1.58 (m, 4H, -CH<sub>2</sub>-), 1.51-1.46 (m, 4H, -CH<sub>2</sub>-), 1.37-1.35 (m, 4H, -CH<sub>2</sub>-), 0.23 (s, 9H, -CH<sub>3</sub>).

### **Compound 19:**

Compound **19** was synthesized in a similar manner described as compound **4**, the product was a red

solid (2.0 g, 81.0%).  $^1\text{H}$  NMR (300 MHz,  $\text{CDCl}_3$ , 298 K),  $\delta$  (TMS, ppm): 10.01 (s, H, -CHO), 7.36-7.33 (d,  $J = 8.7$  Hz, 2H, ArH), 7.08-6.84 (m, 3H, -CH=CH-, ArH), 6.61-6.58 (d,  $J = 8.7$  Hz, 2H, ArH), 3.56-3.52 (m, 4H, -CH<sub>2</sub>-), 3.32-3.28 (m, 4H, -CH<sub>2</sub>-), 1.82-1.77 (m, 4H, -CH<sub>2</sub>-), 1.61-1.56 (m, 4H, -CH<sub>2</sub>-), 1.52-1.49 (m, 4H, -CH<sub>2</sub>-), 1.38-1.36 (m, 4H, -CH<sub>2</sub>-), 0.27 (s, 9H, -CH<sub>3</sub>).

#### Compound 20:

Compound **20** was synthesized in a similar manner described as compound **5**, the product was a red solid (1.2 g, 93.0%).  $^1\text{H}$  NMR (300 MHz,  $\text{CDCl}_3$ , 298 K),  $\delta$  (TMS, ppm): 10.02 (s, H, -CHO), 7.37-7.34 (d,  $J = 9.0$  Hz, 2H, ArH), 7.08-6.84 (m, 3H, -CH=CH-, ArH), 6.61-6.58 (d,  $J = 8.4$  Hz, 2H, ArH), 3.57-3.53 (m, 4H, -CH<sub>2</sub>-), 3.42 (s, -C $\equiv$ CH), 3.33-3.28 (m, 4H, -CH<sub>2</sub>-), 1.82-1.77 (m, 4H, -CH<sub>2</sub>-), 1.59 (m, 4H, -CH<sub>2</sub>-), 1.55-1.45 (m, 4H, -CH<sub>2</sub>-), 1.38-1.36 (m, 4H, -CH<sub>2</sub>-).

#### Compound 21:

Compound **21** was synthesized in a similar manner described as compound **6**, compound **21** was synthesized from compound **20** and **1,6-diazidohexane**, the product was red solid (610 mg, 78.7%).

$^1\text{H}$  NMR (300 MHz,  $\text{CDCl}_3$ , 298 K),  $\delta$  (TMS, ppm): 10.31 (s, H, -CHO), 8.05 (s, H, -CH=), 7.43 (s, H, ArH), 7.38-7.35 (d,  $J = 8.7$  Hz, 2H, ArH), 7.13-6.93 (m, 2H, -CH=CH-), 6.62-6.59 (d,  $J = 8.7$  Hz, 2H, ArH), 4.44-4.42 (m, 2H, -CH<sub>2</sub>-), 3.56-3.55 (m, 4H, -CH<sub>2</sub>-), 3.30-3.28 (m, 6H, -CH<sub>2</sub>-), 1.99 (m, 2H, -CH<sub>2</sub>-), 1.81-1.77 (m, 4H, -CH<sub>2</sub>-), 1.61 (m, 2H, -CH<sub>2</sub>-), 1.49-1.39 (m, 12H, -CH<sub>2</sub>-).

#### Compound 22:

Compound **22** was synthesized in a similar manner described as compound **16**, the product was a red solid (450 mg, 92.9%).  $^1\text{H}$  NMR (300 MHz,  $\text{CDCl}_3$ , 298 K),  $\delta$  (TMS, ppm): 10.32 (s, H, -CHO), 8.04 (s, H, -CH=), 7.42 (s, H, ArH), 7.38-7.35 (d,  $J = 8.7$  Hz, 2H, ArH), 7.13-6.92 (m, 2H,

-CH=CH-), 6.62-6.59 (d,  $J = 8.7$  Hz, 2H, ArH), 4.44-4.41 (m, 2H, -CH<sub>2</sub>-), 3.31-3.25 (m, 12H, -CH<sub>2</sub>-), 2.04-1.97 (m, 2H, -CH<sub>2</sub>-), 1.62-1.60 (m, 4H, -CH<sub>2</sub>-), 1.40 (m, 2H, -CH<sub>2</sub>-), 1.49-1.39 (m, 16H, -CH<sub>2</sub>-).

#### **FTC-4:**

**FTC-4** was synthesized in a similar manner described as **FTC-1**, the product was a dark solid (320 mg, 85.0%). <sup>1</sup>H NMR (300 MHz, CDCl<sub>3</sub>, 298 K),  $\delta$  (TMS, ppm): 9.06-9.01 (d,  $J = 15.3$  Hz, H, -CH=), 7.90 (s, H, -CH=), 7.41-7.38 (d,  $J = 7.8$  Hz, 2H, ArH), 7.13-6.95 (m, 2H, -CH=CH-), 6.70-6.61 (m, 3H, ArH), 4.45 (m, 2H, -CH<sub>2</sub>-), 3.13-3.29 (m, 8H, -CH<sub>2</sub>-), 2.00 (m, 2H, -CH<sub>2</sub>-), 1.82 (s, 6H, -CH<sub>3</sub>), 1.59 (m, 14H, -CH<sub>2</sub>-), 1.42 (m, 10H, -CH<sub>2</sub>-).

### **3. Reference**

- (1) Z. a. Li, G. Yu, Y. Liu, C. Ye, J. Qin and Z. Li, *Macromolecules* 2009, **42**, 6463-6472.
- (2) Z. Li, W. Wu, Q. Li, G. Yu, L. Xiao, Y. Liu, C. Ye, J. Qin and Z. Li, *Angew. Chem.* 2010, **49**, 2763-7.
- (3) R. Tang, H. Chen, S. Zhou, B. Liu, D. Gao, H. Zeng and Z. Li, *Polym. Chem.* 2015, **6**, 6680-6688.
- (4) R. Tang, S. Zhou, W. Xiang, Y. Xie, H. Chen, Q. Peng, G. Yu, B. Liu, H. Zeng, Q. Li and Z. Li, *J. Mater. Chem. C* 2015, **3**, 4545-4552.
- (5) R. Tang, S. Zhou, Z. Cheng, G. Yu, Q. Peng, H. Zeng, G. Guo, Q. Li and Z. Li, *Chem. Sci.* 2016.
- (6) W. Wu, L. Huang, Y. Fu, C. Ye, J. Qin and Z. Li, *Chinese Sci. Bull.* 2013, **58**, 2753-2761.
- (7) C. Zhang, C. Wang, L. R. Dalton, H. Zhang and W. H. Steier, *Macromolecules* 2000, **34**,

253-261.

(8) W. Wu, L. Huang, C. Song, G. Yu, C. Ye, Y. Liu, J. Qin, Q. Li and Z. Li, *Chem. Sci.* 2012, **3**,

1256.
